# Supplementary material for: Nei Endonuclease VIII-like 2 Gene rs8191670 Polymorphism affects the Sensitivity of Non-small Cell Lung Cancer to Cisplatin by binding with MiR-548a
Source: PubMed Central journal article supplement (PMC7330683; doi:10.7150/jca.47495), 2020-06-06
Supplement: jcav11p4801s1.pdf [file jcav11p4801s1.pdf]

Table 1 The clinicopathological characteristics of non-small cell lung cancer (NSCLC) patients and the chemotherapy regimens (N=206)

| <b>Characteristic</b>       | <b>Case n (%)</b> |
|-----------------------------|-------------------|
| <b>Gender</b>               |                   |
| Male                        | 130(63.1)         |
| Female                      | 76(31.9)          |
| <b>Age/year</b>             |                   |
| ≤60                         | 101 (49.0)        |
| >60                         | 105(51)           |
| <b>Smoking history</b>      |                   |
| Yes                         | 95 (46.1)         |
| No                          | 111 (53.9)        |
| <b>Histological type</b>    |                   |
| Adenocarcinoma              | 85 (41.3)         |
| Squamous cell               | 121 (58.7)        |
| <b>Chemotherapy regimen</b> |                   |
| Pemetrexed-platinum         | 85 (41.3)         |
| Gemcitabine-platinum        | 112 (54.4)        |
| Docetaxel-platinum          | 9 (4.3)           |

Table 2 The associations between the rs8191670 polymorphism of Nei endonuclease VIII -like 2 (Neil 2) gene and the incidence rate of drug-related adverse reactions (N=206, n (%))

| Toxicity         | T/T type(n=110) |                 | T/C type(n=54) |                 | C/C type(n=42) |                 | <i>P</i> value |
|------------------|-----------------|-----------------|----------------|-----------------|----------------|-----------------|----------------|
|                  | Grade 1-2       | Graded $\geq$ 3 | Grade 1-2      | Graded $\geq$ 3 | Grade 1-2      | Graded $\geq$ 3 |                |
| Nausea           | 50(45.5)        | 2(1.8)          | 21(38.9)       | 0(0.0)          | 18(42.9)       | 0(0.0)          | 0.21           |
| Vomiting         | 30(27.3)        | 1(0.1)          | 18(33.3)       | 0(0.0)          | 14(33.3)       | 0(0.0)          | 0.17           |
| Diarrhea         | 0(0.0)          | 0(0.0)          | 0(0.0)         | 0(0.0)          | 0(0.0)         | 0(0.0)          | 0.50           |
| Leukopenia       | 62(56.4)        | 4(3.6)          | 24(44.4)       | 1(1.8)          | 20(47.6)       | 1(2.3)          | 0.35           |
| Anemia           | 48(43.6)        | 1(0.1)          | 20(37.0)       | 0(0.0)          | 16(38.0)       | 0(0.0)          | 0.26           |
| Thrombocytopenia | 20(18.2)        | 2(1.8)          | 12(22.2)       | 1(1.8)          | 9(21.4)        | 0(0.0)          | 0.40           |
| Fever related    | 0(0.0)          | 0(0.0)          | 0(0.0)         | 0(0.0)          | 0(0.0)         | 0(0.0)          | 0.50           |
| -leukopenia      |                 |                 |                |                 |                |                 |                |
